# Supplementary material for: Hierarchically porous electrospun nanofibrous mats produced from intrinsically microporous fluorinated polyimide for the removal of oils and non-polar solvents
Source: Royal Society of Chemistry journal article supplement (doi:10.1039/d0en00084a), 2020-01-01
Supplement: d0en00084a1.pdf [file d0en00084a1.pdf]

## Electronic Supplementary Information (ESI)

---

# Hierarchically porous electrospun nanofibrous mats produced from intrinsically microporous fluorinated polyimide for the removal of oils and non-polar solvents

*Fuat Topuz<sup>a,\*</sup> Mahmoud A. Abdulhamid,<sup>a</sup> Suzana P. Nunes<sup>a,b</sup> and Gyorgy Szekely<sup>a,c\*</sup>*

*<sup>a</sup>Advanced Membranes and Porous Materials Center, Physical Science and Engineering  
Division (PSE), King Abdullah University of Science and Technology (KAUST), Thuwal, 23955-  
6900, Saudi Arabia*

*<sup>b</sup>Biological and Environmental Science and Engineering, King Abdullah University of Science  
and Technology (KAUST), Thuwal, 23955-6900, Saudi Arabia*

*<sup>c</sup>School of Chemical Engineering and Analytical Science, University of Manchester, The Mill,  
Sackville Street, Manchester M1 3BB, United Kingdom*

---

*\* To whom correspondence should be addressed: Dr. F. Topuz (fuat.topuz@kaust.edu.sa), Prof.  
G. Szekely (gyorgy.szekely@kaust.edu.sa). Phone: +966128082769.*

## Table of Contents

|                                                                                                                                                                                                                                                                                                            |       |
|------------------------------------------------------------------------------------------------------------------------------------------------------------------------------------------------------------------------------------------------------------------------------------------------------------|-------|
| <b>Experimental Section</b>                                                                                                                                                                                                                                                                                | S3    |
| <b>Characterization</b>                                                                                                                                                                                                                                                                                    | S3    |
| <b>Membrane Preparation</b>                                                                                                                                                                                                                                                                                | S3    |
| <b>Table S1.</b> The characteristics of the 6FDA-TrMPD polyimide. Weight ( $M_w$ ) and number ( $M_n$ ) average molecular weights, polydispersity index (PDI), degradation temperature $T_{d,5\%}$ , and surface area ( $S_{BET}$ ).                                                                       | S3    |
| <b>Fig. S1.</b> $^1H$ NMR spectrum of the 6FDA-TrMPD in DMSO- $d_6$ .                                                                                                                                                                                                                                      | S4    |
| <b>Fig. S2.</b> Attenuated total reflectance Fourier-transform infrared spectrum (ATR-FTIR) spectrum of the 6FDA-TrMPD.                                                                                                                                                                                    | S4    |
| <b>Fig. S3.</b> TGA thermograms of the 6FDA-TrMPD (a) powder and (b) electrospun mat.                                                                                                                                                                                                                      | S5    |
| <b>Fig. S4.</b> The use of the electrospun mat for water-oil separation. (a) Before, and (b-d) during the separation process.                                                                                                                                                                              | S5    |
| <b>Fig. S5.</b> Stress-strain curves of the free standing film made truly from the 6FDA-TrMPD powder (a) and its electrospun mat (b).                                                                                                                                                                      | S6    |
| <b>Fig. S6.</b> Contact angle measurements of the fiber mat for various oils. The mat imbibed oil droplets immediately upon contact with the droplet (i.e. oil contact angle (OCA) $< 1^\circ$ ), demonstrating superoleophilicity.                                                                        | S6    |
| <b>Fig. S7.</b> The influence of the applied voltage on the morphology of the 6FDA-TrMPD nanofibers. $c_{6FDA-TrMPD} = 10\%$ (w/v). The tip-to-collector distance kept at 15 cm and the flow rate set to 0.5 mL/h. Insets show the statistical distribution for the diameter of the respective nanofibers. | S7    |
| <b>Fig. S8.</b> The influence of the flow rate on the morphology of the 6FDA-TrMPD nanofibers. $c_{6FDA-TrMPD} = 10\%$ (w/v). The applied voltage was 20 kV and the tip-to-collector distance kept at 15 cm. Insets show the statistical distribution for the diameter of the respective nanofibers.       | S7    |
| <b>Fig. S9.</b> Scanning electron micrographs of the 6FDA-TrMPD nanofibers exposed to various solvents for 24 h. $c_{6FDA-TrMPD} = 10\%$ (w/v). (a) Control sample without any solvent treatment, (b) water, (c) ethanol (EtOH), (d) hexane, and (e) acetonitrile (ACN).                                   | S8    |
| <b>Fig. S10.</b> Scanning electron micrographs of the electrospun mats exposed to toluene (a-c) and <i>m</i> -xylene (d-e) for 24 h. Insets show the statistical distribution for the diameter of the respective nanofibers.                                                                               | S8    |
| <b>Table S2.</b> Oil sorption performance of various polymeric adsorbents.                                                                                                                                                                                                                                 | S9-10 |

## Experimental Section.

**Membrane Preparation.** A 6FDA-TrMPD dense film was prepared through solvent evaporation from (3 wt/vol%) its polymer solution in chloroform. The solution was filtered through 0.45  $\mu\text{m}$  PTFE filter and poured onto a flat glass Petri dish. The solvent was evaporated slowly at RT over 24 h. Thereafter, the obtained film was further dried at 120  $^{\circ}\text{C}$  for 24 h under vacuum. The resulting robust film with a thickness of  $\sim 40\ \mu\text{m}$  was used for tensile measurement and for BET surface area analysis.

**Characterization.** The infrared spectrum was recorded for polyimide powder using a Varian 670-IR FT-IR spectrometer.

**Table S1.** The characteristics of the 6FDA-TrMPD polyimide. Weight ( $M_w$ ) and number ( $M_n$ ) average molecular weights, polydispersity index (PDI), degradation temperature  $T_{d,5\%}$ , and surface area ( $S_{\text{BET}}$ ).

|            | $M_w$                   | $M_n$                   | PDI  | $T_{d, 5\%}$           | $S_{\text{BET}}$               |
|------------|-------------------------|-------------------------|------|------------------------|--------------------------------|
| Polymer    | ( $\text{g mol}^{-1}$ ) | ( $\text{g mol}^{-1}$ ) | (-)  | ( $^{\circ}\text{C}$ ) | ( $\text{m}^2 \text{g}^{-1}$ ) |
| 6FDA-TrMPD | 176,606                 | 110,987                 | 1.59 | 509                    | $450 \pm 15$                   |

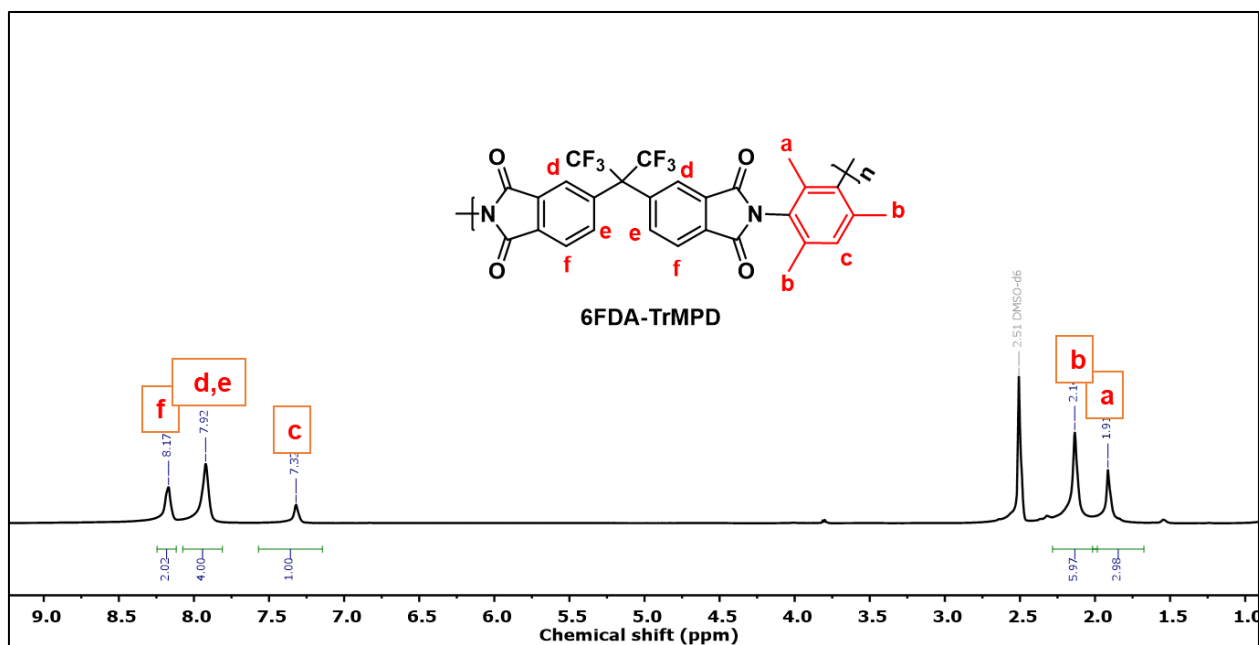

**Fig. S1.** <sup>1</sup>H NMR spectrum of the 6FDA-TrMPD in DMSO-d<sub>6</sub>.

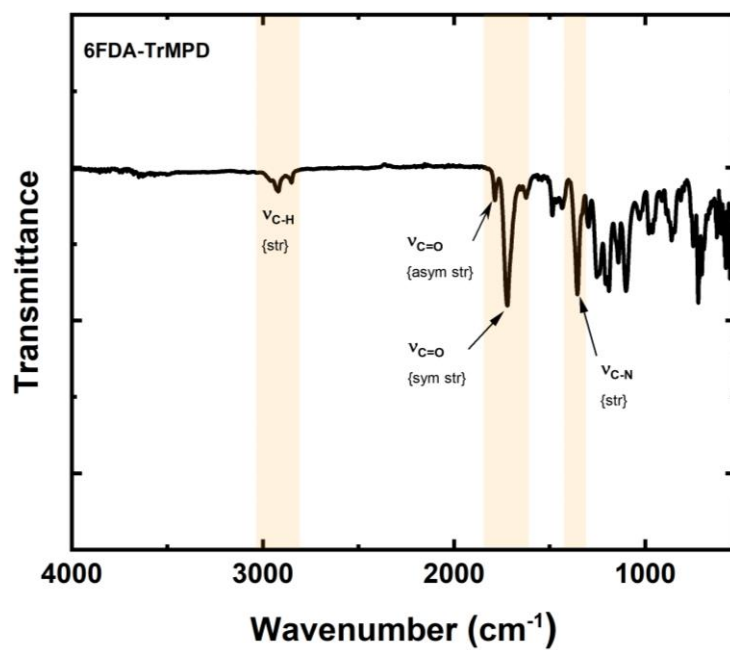

**Fig. S2.** Attenuated total reflectance Fourier-transform infrared spectrum (ATR-FTIR) spectrum of the 6FDA-TrMPD.

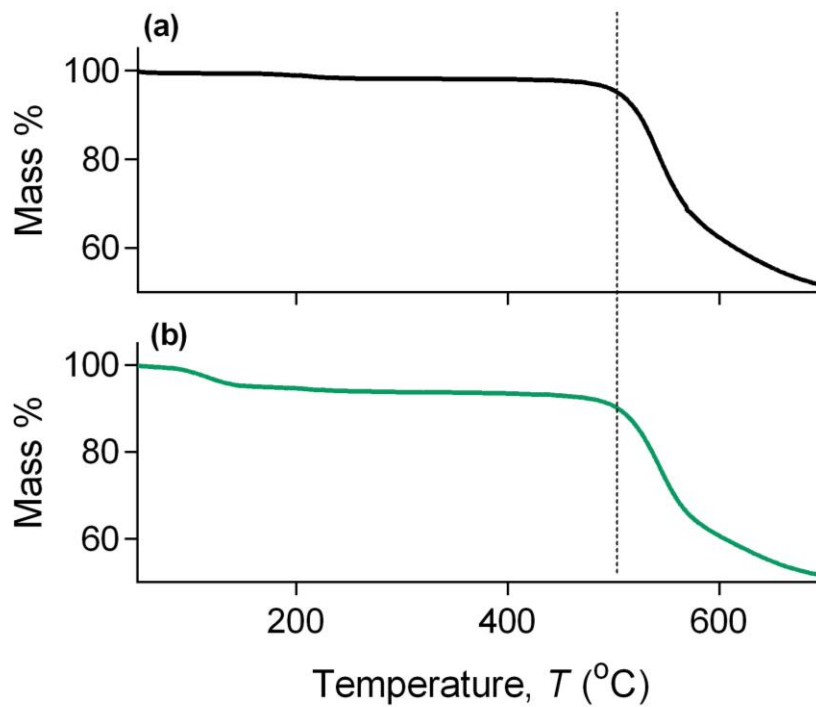

**Fig. S3.** TGA thermograms of the 6FDA-TrMPD (a) powder and (b) electrospun mat.

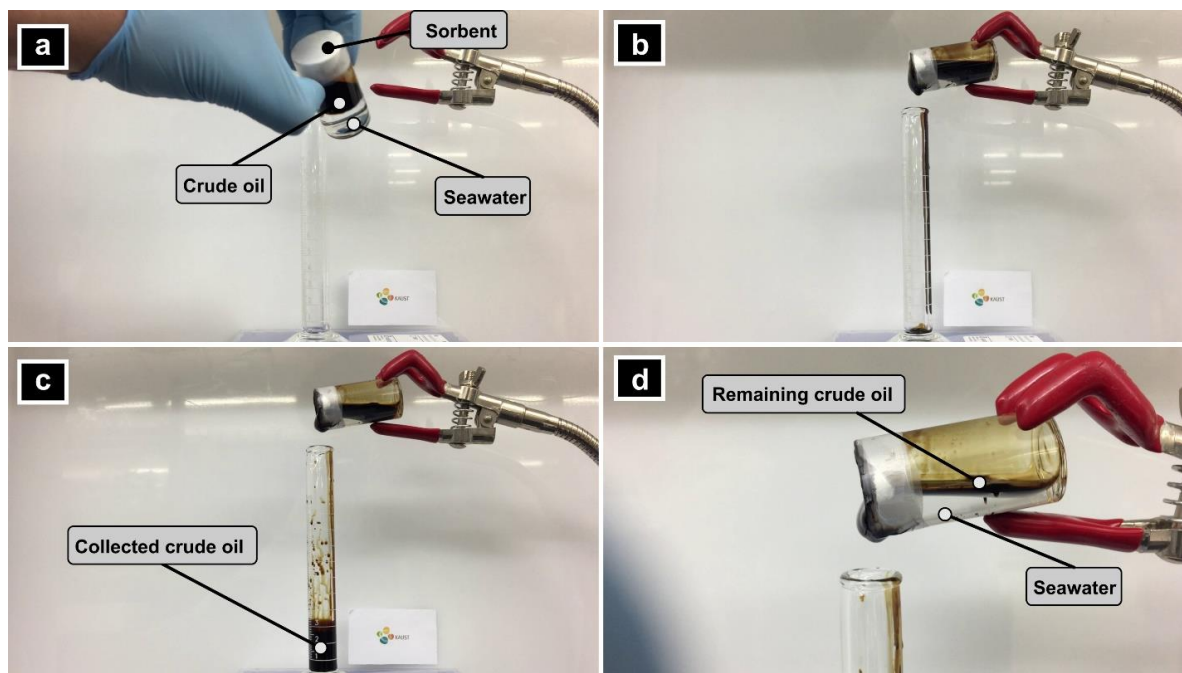

**Fig. S4.** The use of the electrospun mat for water-oil separation. (a) Before, and (b-d) during the separation process.

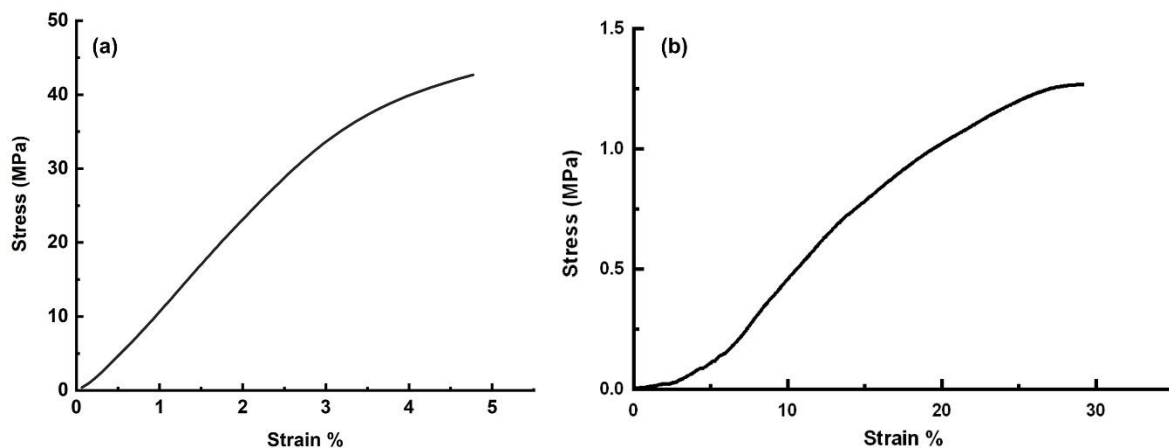

**Fig. S5.** Stress-strain curves of the free standing film made truly from the 6FDA-TrMPD powder (a) and its electrospun mat (b).

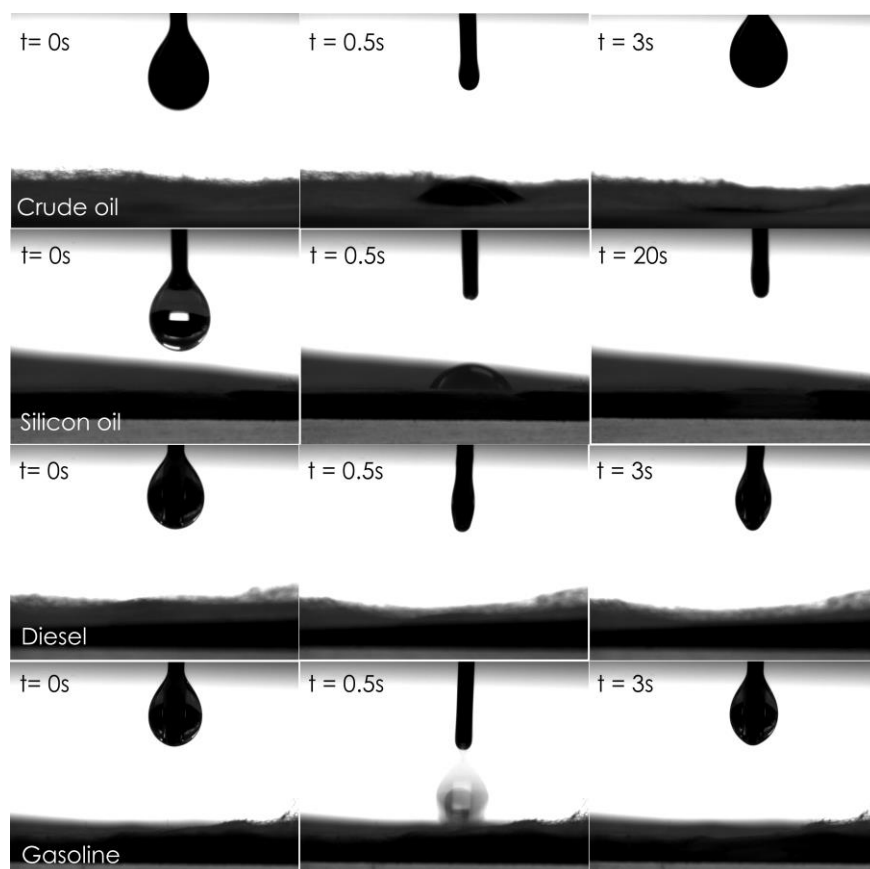

**Fig. S6.** Contact angle measurements of the fiber mat using various oils. The mat imbibed oil droplets immediately upon contact with the droplet (*i.e.* oil contact angle (OCA)  $< 1^\circ$ ), demonstrating superoleophilicity.

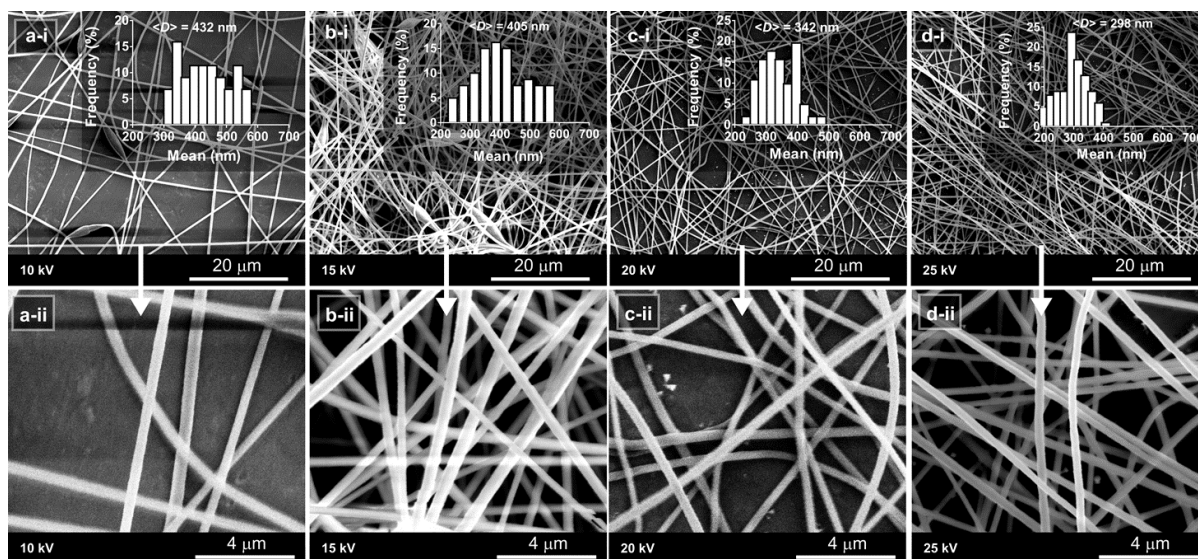

**Fig. S7.** The influence of the applied voltage on the morphology of the 6FDA-TrMPD nanofibers.  $c_{6\text{FDA-TrMPD}} = 10\%$  (w/v). The tip-to-collector distance kept at 15 cm and the flow rate set to 0.5 mL/h. Insets show the statistical distribution for the diameter of the respective nanofibers.

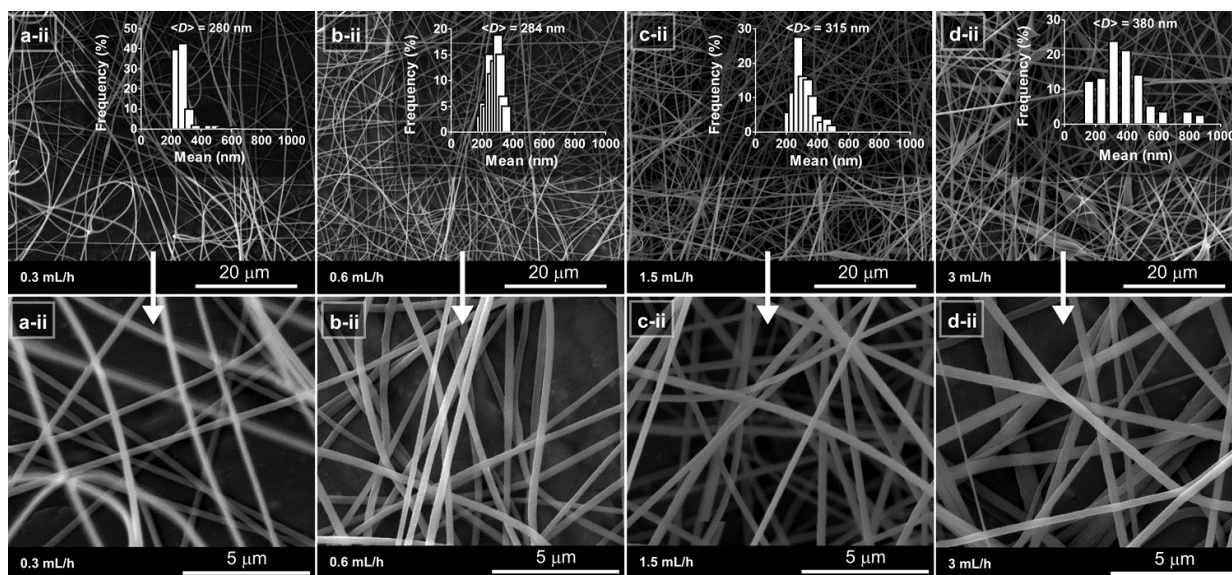

**Fig. S8.** The influence of the flow rate on the morphology of the 6FDA-TrMPD nanofibers.  $c_{6\text{FDA-TrMPD}} = 10\%$  (w/v). The applied voltage was 20 kV and the tip-to-collector distance kept at 15 cm. Insets show the statistical distribution for the diameter of the respective nanofibers.



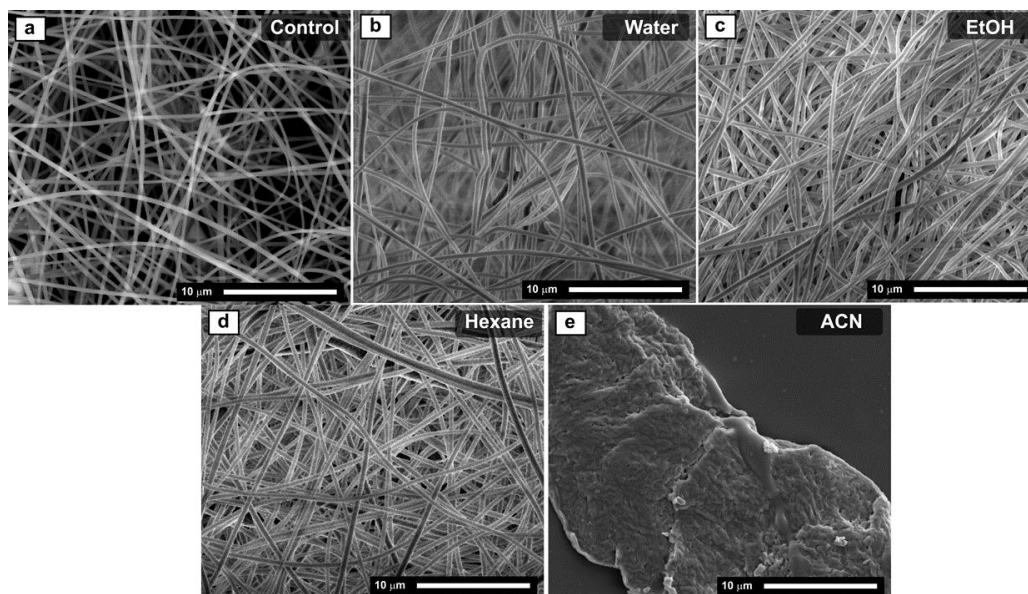

**Fig. S9.** Scanning electron micrographs of the 6FDA-TrMPD nanofibers exposed to various solvents for 24 h.  $C_{6FDA}$ - $TrMPD$  = 10% (w/v). (a) Control sample without any solvent treatment, (b) water, (c) ethanol (EtOH), (d) hexane, and (e) acetonitrile (ACN).

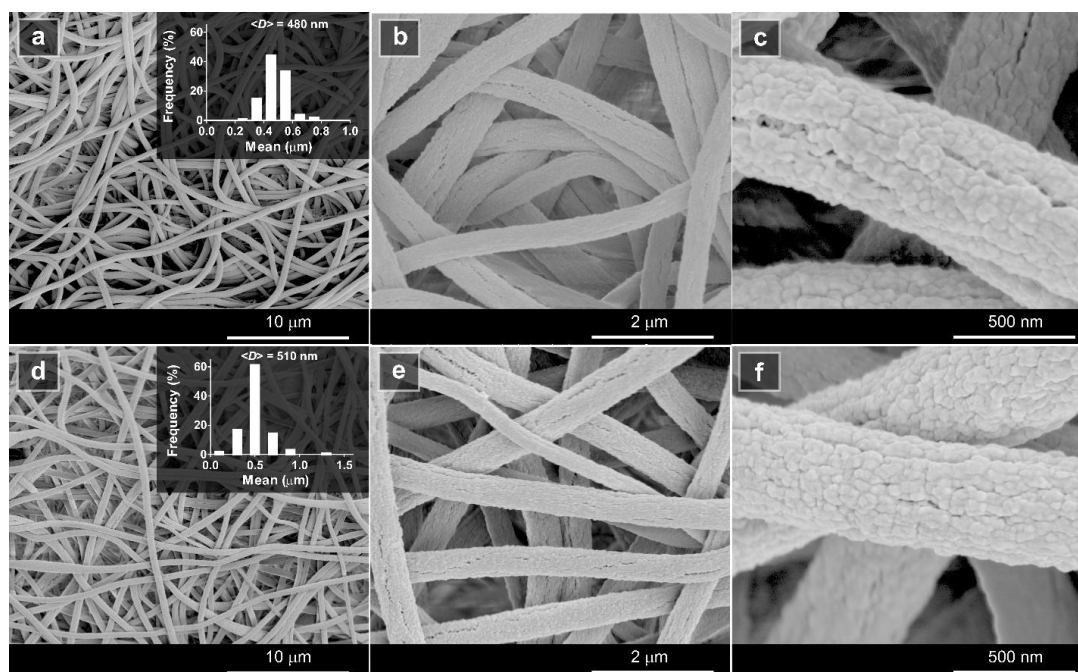

**Fig. S10.** Scanning electron micrographs of the electrospun mats exposed to toluene (a-c) and m-xylene (d-e) for 24 h. Insets show the statistical distribution for the diameter of the respective nanofibers.



**Table S2.** Oil sorption performance of various polymeric adsorbents.

| Sorbent                                                            | Material form | BET surface area (m <sup>2</sup> g <sup>-1</sup> ) | Sorbate    | Sorption capacity (g g <sup>-1</sup> ) | Ref.          |
|--------------------------------------------------------------------|---------------|----------------------------------------------------|------------|----------------------------------------|---------------|
| Intrinsically porous fluorinated polyimides                        | Fibrous mat   | 560                                                | Crude oil  | 34.6                                   | This study    |
|                                                                    |               |                                                    | Diesel     | 55.76                                  |               |
|                                                                    |               |                                                    | Gasoline   | 31.25                                  |               |
| A porous superhydrophobic SiO <sub>2</sub> @polystyrene            | Foam          | n.d.                                               | Crude oil  | 32.1                                   | <sup>1</sup>  |
| Bio-based oil gelling agent                                        | Powder        | n.d.                                               | Crude oil  | 4.7                                    | <sup>2</sup>  |
| SiO <sub>2</sub> decorated cotton fibers                           | Fibers        | n.d.                                               | Crude oil  | 57.0                                   | <sup>3</sup>  |
|                                                                    |               |                                                    | Diesel     | 25.61                                  |               |
| Porous PS fibers                                                   | Fibers        | n.d.                                               | Diesel     | 7.13                                   | <sup>4</sup>  |
| Carbon shoot sponge                                                | Sponge        | 440                                                | Crude oil  | ~30                                    | <sup>5</sup>  |
| Cellulose-based aerogels                                           | Aerogel       | n.d.                                               | Crude oils | 18.4-20.5                              | <sup>6</sup>  |
| Graphene sponge                                                    | Sponge        | n.d.                                               | Crude oil  | 85-90                                  | <sup>7</sup>  |
| CNF/carbon foam                                                    | Foam          | n.d.                                               | Diesel     | 21                                     | <sup>8</sup>  |
|                                                                    |               |                                                    | Gasoline   | 16                                     |               |
| Lignin-based polyurethane/graphene oxide foam                      | Foam          | n.d.                                               | Crude oil  | 25.4                                   | <sup>9</sup>  |
| Poly(dimethylsiloxane)-TiO <sub>2</sub> coated polyurethane sponge | Sponge        | n.d.                                               | Diesel     | 14.2                                   | <sup>10</sup> |

n.d.: Not determined

## References

1. C. Yu, W. Lin, J. Jiang, Z. Jing, P. Hong and Y. Li, Preparation of a porous superhydrophobic foam from waste plastic and its application for oil spill cleanup, *RSC Advances*, 2019, **9**, 37759-37767. <https://doi.org/10.1039/C9RA06848A>
2. P. Lv, S. Yang and P.-C. Ma, Bio-based oil gelling agent for effective removal of oil spills from the surface of water, *Materials Chemistry Frontiers*, 2018, **2**, 1784-1790. <https://doi.org/10.1039/C8QM00127H>
3. N. Lv, X. Wang, S. Peng, L. Luo and R. Zhou, Superhydrophobic/superoleophilic cotton-oil absorbent: preparation and its application in oil/water separation, *RSC Advances*, 2018, **8**, 30257-30264. <https://doi.org/10.1039/C8RA05420G>
4. J. Wu, N. Wang, L. Wang, H. Dong, Y. Zhao and L. Jiang, Electrospun Porous Structure Fibrous Film with High Oil Adsorption Capacity, *ACS Applied Materials & Interfaces*, 2012, **4**, 3207-3212. <https://doi.org/10.1021/am300544d>
5. Y. Gao, Y. S. Zhou, W. Xiong, M. Wang, L. Fan, H. Rabiee-Golgir, L. Jiang, W. Hou, X. Huang, L. Jiang, J.-F. Silvain and Y. F. Lu, Highly Efficient and Recyclable Carbon Soot Sponge for Oil Cleanup, *ACS Applied Materials & Interfaces*, 2014, **6**, 5924-5929. <https://doi.org/10.1021/am500870f>
6. S. T. Nguyen, J. Feng, N. T. Le, A. T. T. Le, N. Hoang, V. B. C. Tan and H. M. Duong, Cellulose Aerogel from Paper Waste for Crude Oil Spill Cleaning, *Industrial & Engineering Chemistry Research*, 2013, **52**, 18386-18391. <https://doi.org/10.1021/ie4032567>
7. R.-F. Shiu, C.-L. Lee, P.-Y. Hsieh, C.-S. Chen, Y.-Y. Kang, W.-C. Chin and N.-H. Tai, Superhydrophobic graphene-based sponge as a novel sorbent for crude oil removal under various environmental conditions, *Chemosphere*, 2018, **207**, 110-117. <https://doi.org/10.1016/j.chemosphere.2018.05.071>

8. N. Xiao, Y. Zhou, Z. Ling and J. Qiu, Synthesis of a carbon nanofiber/carbon foam composite from coal liquefaction residue for the separation of oil and water, *Carbon*, 2013, **59**, 530-536. <https://doi.org/10.1016/j.carbon.2013.03.051>
9. O. Oribayo, X. Feng, G. L. Rempel and Q. Pan, Synthesis of lignin-based polyurethane/graphene oxide foam and its application as an absorbent for oil spill clean-ups and recovery, *Chemical Engineering Journal*, 2017, **323**, 191-202. <https://doi.org/10.1016/j.cej.2017.04.054>
10. Q. Shuai, X. Yang, Y. Luo, H. Tang, X. Luo, Y. Tan and M. Ma, A superhydrophobic poly(dimethylsiloxane)-TiO<sub>2</sub> coated polyurethane sponge for selective absorption of oil from water, *Materials Chemistry and Physics*, 2015, **162**, 94-99. <https://doi.org/10.1016/j.matchemphys.2015.05.011>
